# Supplementary material for: Non-polar modifier assisted analysis of aromatic compounds by means of planar differential ion mobility spectrometry with a 63Ni ionization source
Source: Royal Society of Chemistry journal article supplement (doi:10.1039/c4ay03029j), 2015-01-01
Supplement: c4ay03029j1.pdf [file c4ay03029j1.pdf]

Supporting Information

**Non-polar modifier assisted analysis of aromatic compounds by means of planar differential ion mobility spectrometry with  $^{63}\text{Ni}$  ionization source**

Andriy Kuklya,<sup>\*a</sup> Florian Uteschil,<sup>a</sup> Klaus Kerpen,<sup>a</sup> Robert Marks<sup>a</sup> and Ursula Telgheder<sup>a,b</sup>

<sup>a</sup> Department of Instrumental Analytical Chemistry, University of Duisburg-Essen (UDE)

Universitätsstraße 5, 45141 Essen, Germany

<sup>b</sup> IWW Water Centre, Moritzstr. 26, 45476 Mülheim a.d. Ruhr, Germany

\*To whom correspondence should be addressed: Dr. Andriy Kuklya, Instrumental Analytical Chemistry, Faculty of Chemistry, University Duisburg-Essen, Universitätsstr. 5, D-45141 Essen. Tel: +49(0)201 183-6786, Fax: +49(0)201 183-6773, email: [andriy.kuklya@uni-due.de](mailto:andriy.kuklya@uni-due.de)

Description: Contains 3 Figures.

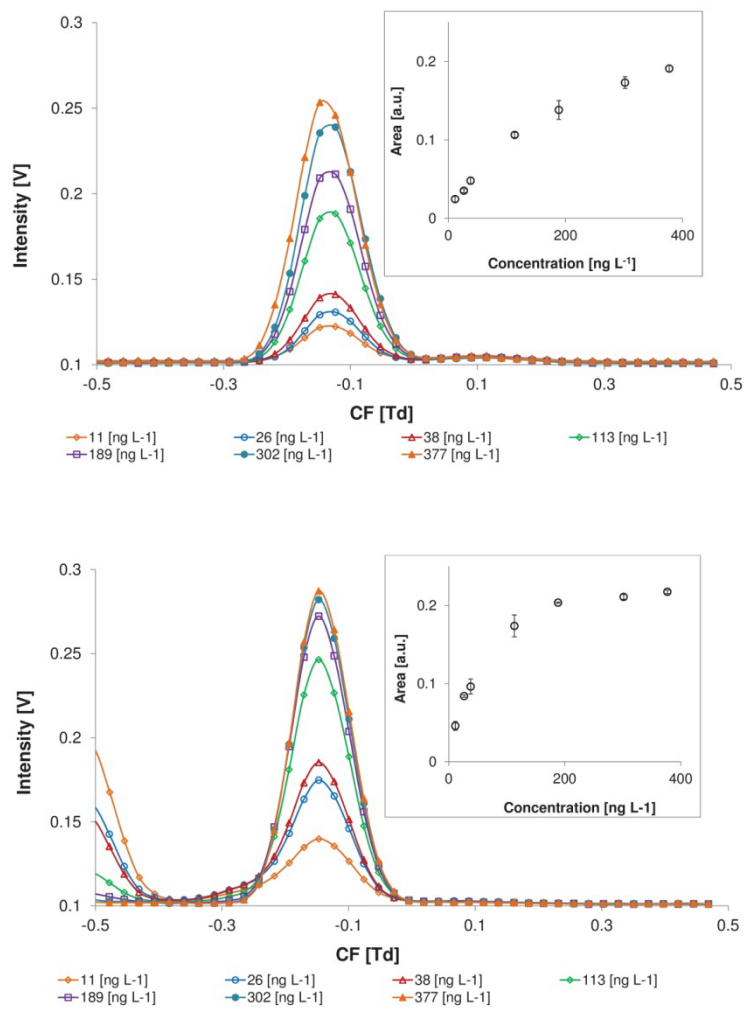

**Fig. S-1:** Differential mobility spectra of 1,2,4-trimethylbenzene at different concentrations without modifier (top) and with 0.015 % of benzene (bottom) in the carrier gas.

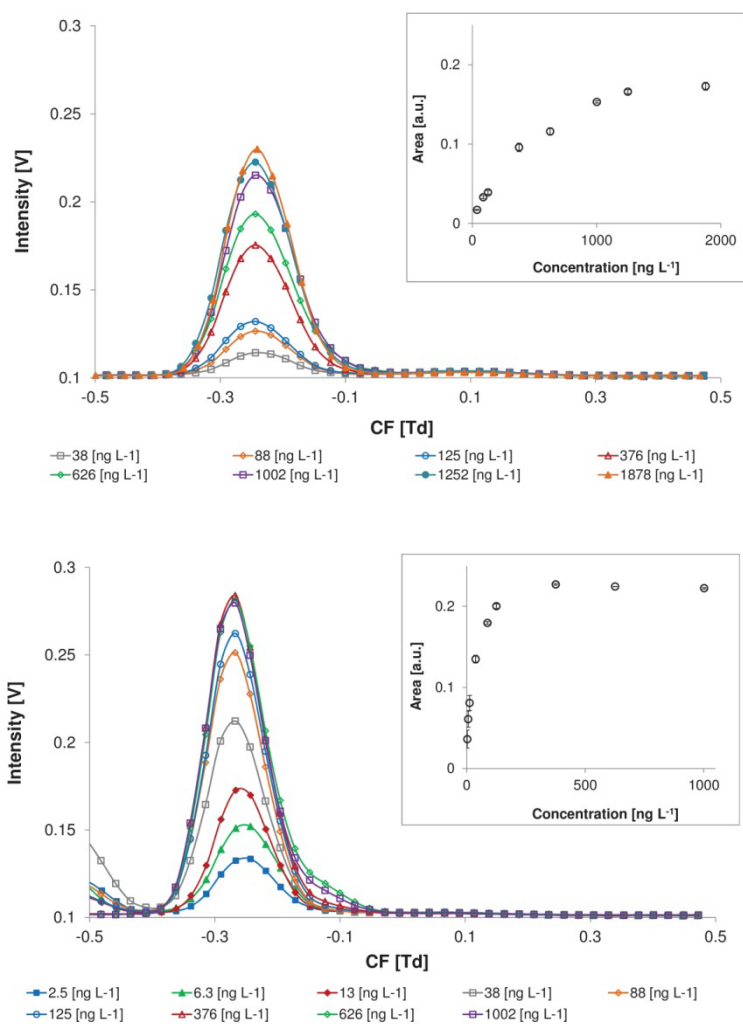

**Fig. S-2:** Differential mobility spectra of *p*-xylene at different concentrations without modifier (top) and with 0.015 % of benzene (bottom) in the carrier gas.

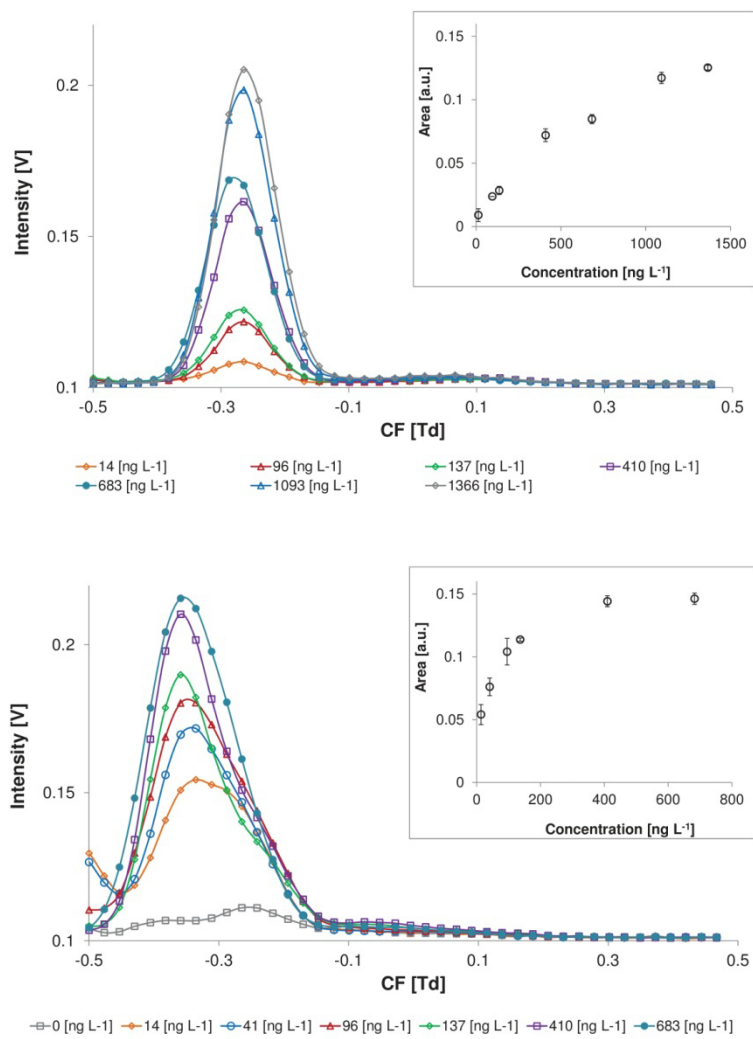

**Fig. S-3:** Differential mobility spectra of ethylbenzene at different concentrations without modifier (top) and with 0.015 % of benzene (bottom) in the carrier gas.

## The relevant equations for the non linear calibration.

The coefficients  $a$ ,  $b$ , and  $c$  for the calibration function  $y = a + bx + cx^2$  can be calculated as follows:

$$Q_{xx} = \sum_{i=1}^n x_i^2 - \frac{(\sum_{i=1}^n x_i)^2}{n};$$

$$Q_{xy} = \sum_{i=1}^n (x_i y_i) - \frac{(\sum_{i=1}^n x_i)(\sum_{i=1}^n y_i)}{n};$$

$$Q_{xx^2} = \sum_{i=1}^n x_i^3 - \frac{(\sum_{i=1}^n x_i)(\sum_{i=1}^n x_i^2)}{n};$$

$$Q_{x^2y} = \sum_{i=1}^n (x_i^2 y_i) - \frac{(\sum_{i=1}^n x_i^2)(\sum_{i=1}^n y_i)}{n};$$

$$Q_{x^2x^2} = \sum_{i=1}^n x_i^4 - \frac{(\sum_{i=1}^n x_i^2)^2}{n};$$

$$c = \frac{Q_{x^2y}Q_{xx} - Q_{xy}Q_{xx^2}}{Q_{xx}Q_{x^2x^2} - (Q_{xx^2})^2};$$

$$b = \frac{Q_{xy}Q_{x^2x^2} - Q_{x^2y}Q_{xx^2}}{Q_{xx}Q_{x^2x^2} - (Q_{xx^2})^2};$$

$$a = \bar{y} - b\bar{x} - \frac{c \sum_{i=1}^n x_i^2}{n};$$

The residual standard deviation:

$$s_y = \sqrt{\frac{\sum_{i=1}^n (y_i - \hat{y}_i)^2}{n-3}};$$

Limit of detection:

$$y_{lod} = a + 3s_y;$$

$$LOD = \frac{-b + \sqrt{b^2 - 4c(a - y_{lod})}}{2c};$$

$y_i$  = individual values for each dependent variable (peak area);

$x_i$  = individual values for each independent variable (concentration);

$n$  = number of points;

$\bar{x}$  and  $\bar{y}$  = average of the  $x$  and  $y$  values;

$$\hat{y} = a + bx_i + cx_i^2;$$
